# Supplementary material for: Expression of heat shock protein 70 is insufficient to extend Drosophila melanogaster longevity
Source: bioRxiv preprint, doi:10.1101/753269, version 2 (2019-09-30)
Supplement: Figure S3 [file 753269_file04.pdf]

# Supplemental Figure 3

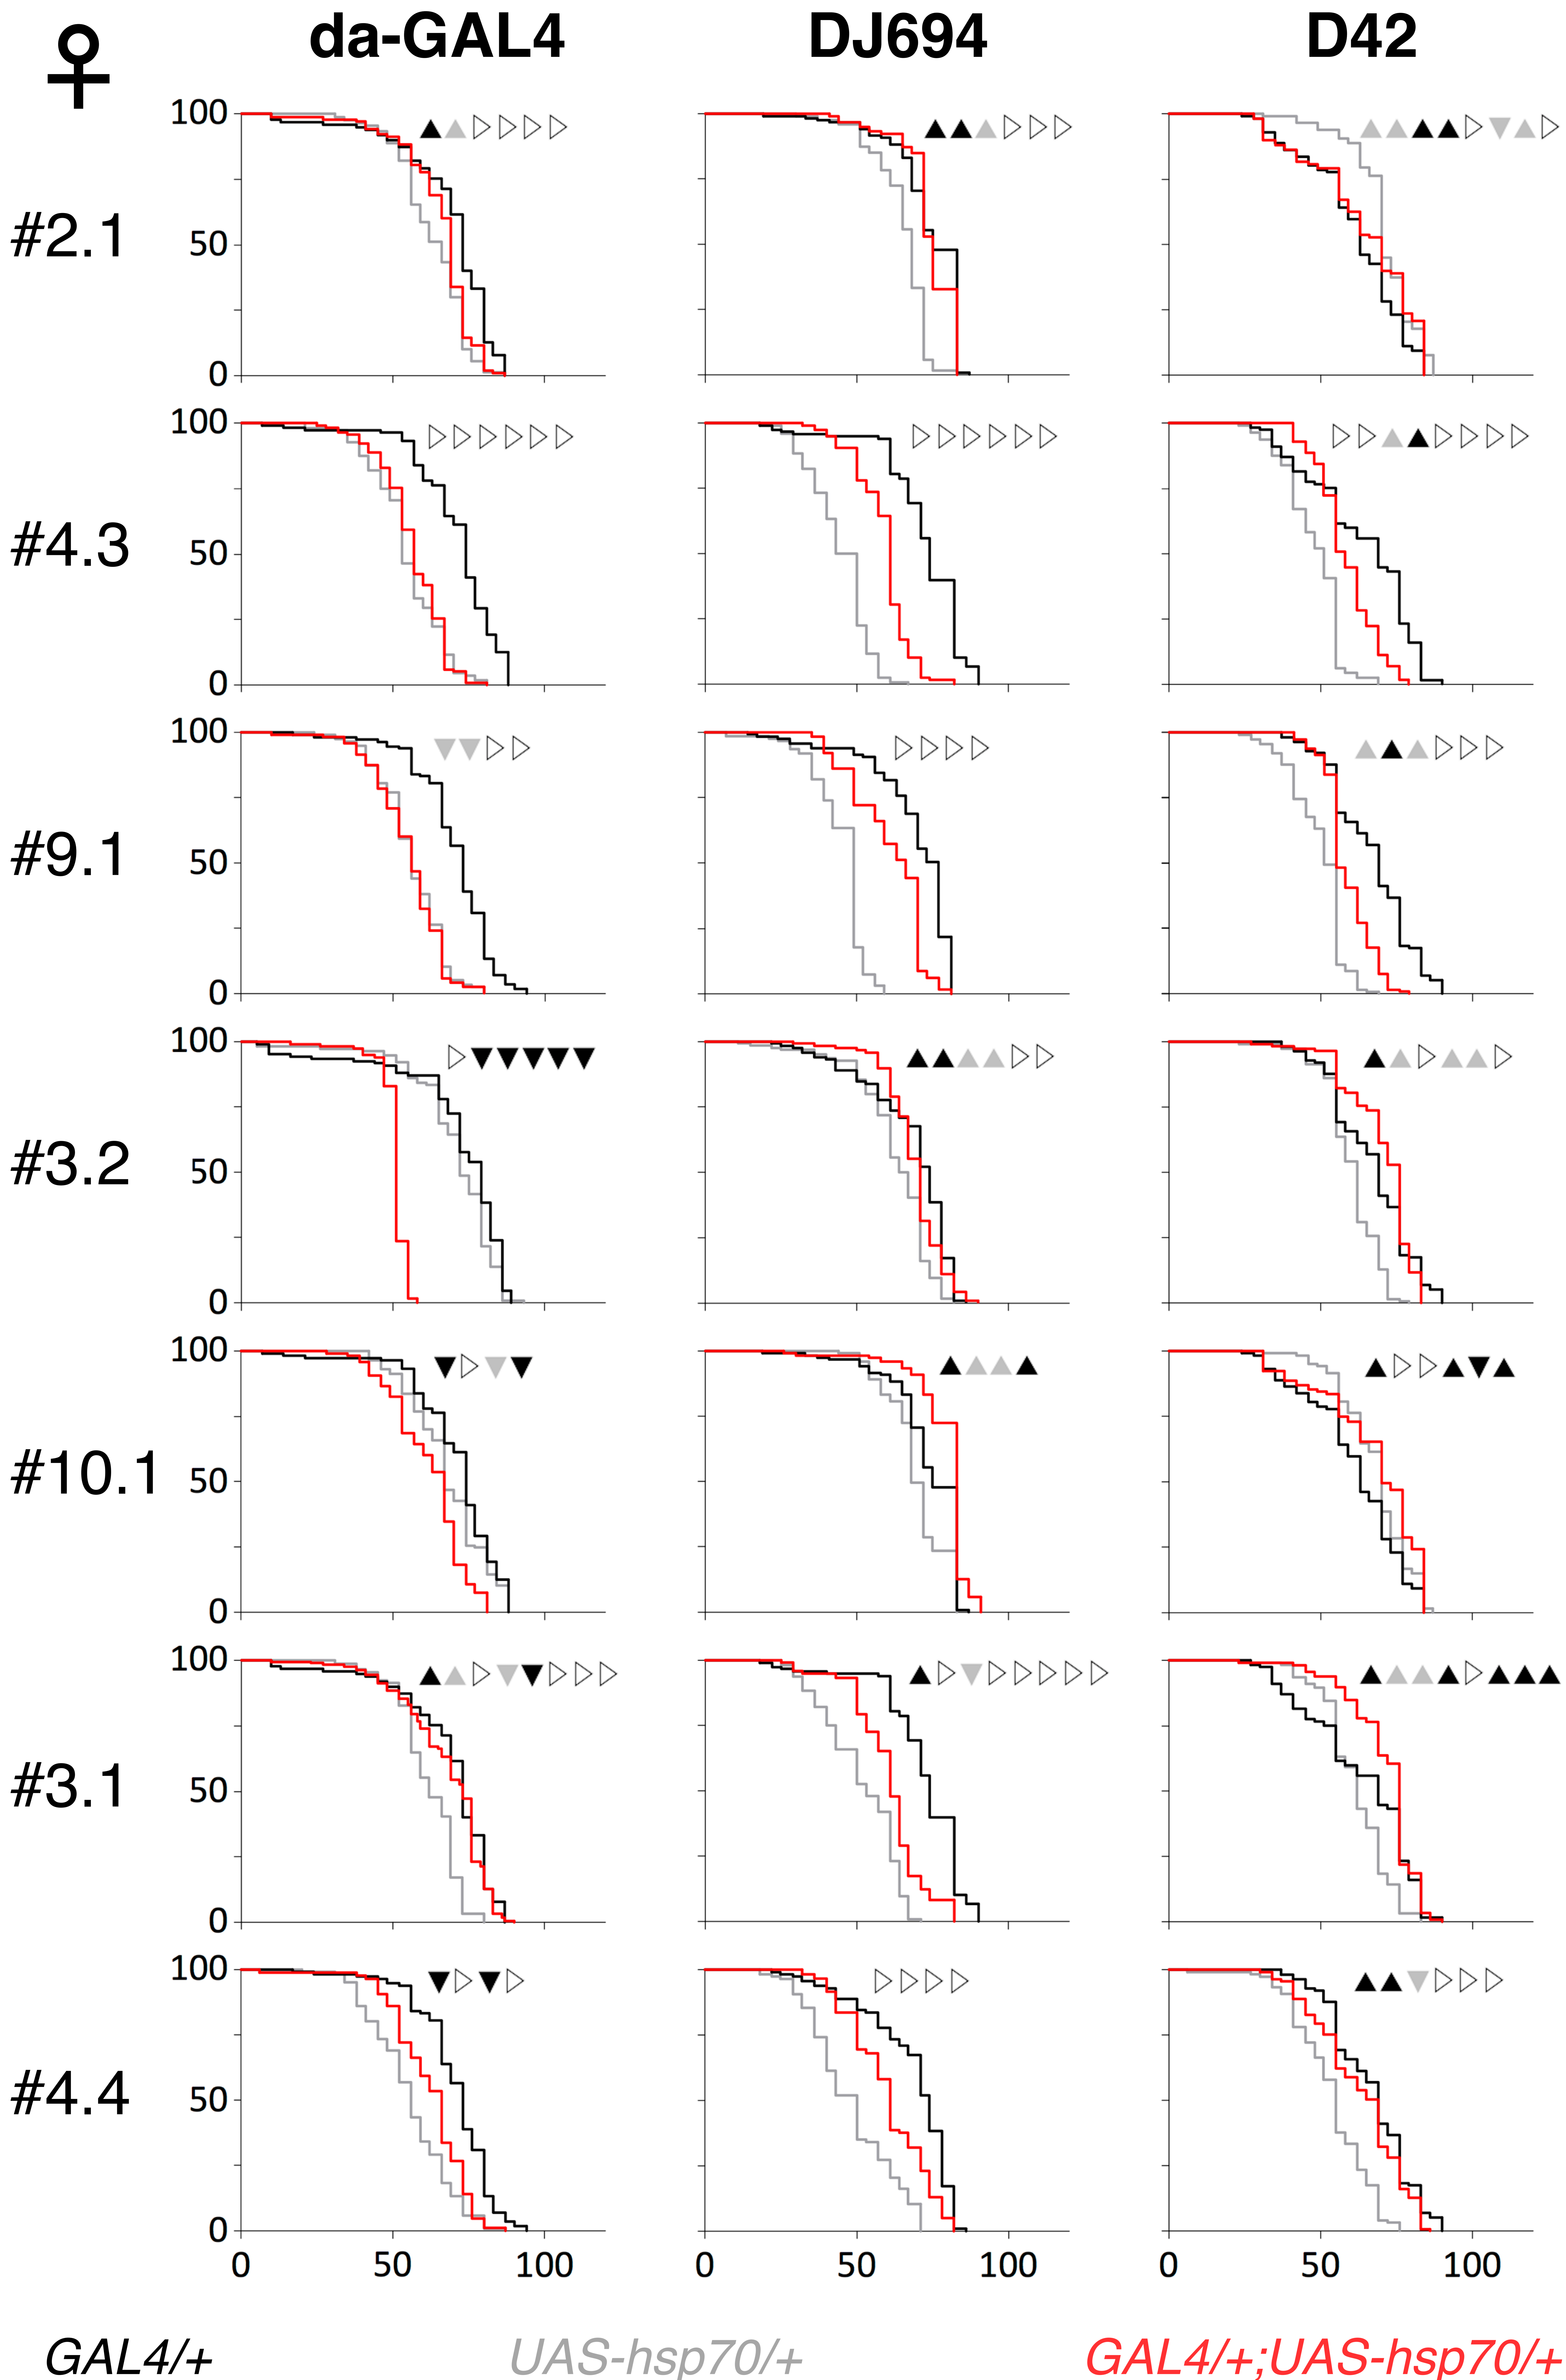

**Figure S3: Longevity of females overexpressing HSP70.** Typical longevity curves (x axis: days at 25°C; y axis: percentage alive) are shown. The outcome of the statistical comparison (Table S3) between experimental and controls for each experimental replicate is provided at the top of each graph: ▲: significant increase ▲: increase ▼: significant decrease ▼: decrease ▷: no change.
